# Supplementary material for: IRF1 Suppresses Gastric Tumorigenesis via Dual PI3K/AKT-ERK Pathway Modulation and Functional Antagonism of Oncogenic MX2
Source: Research Square preprint supplement (doi:10.21203/rs.3.rs-6435174/v1), 2025-06-09
Supplement: Supplementary file 1 [file 627b0897d0a24e702bbf1f58.docx]

**Supplemental information**


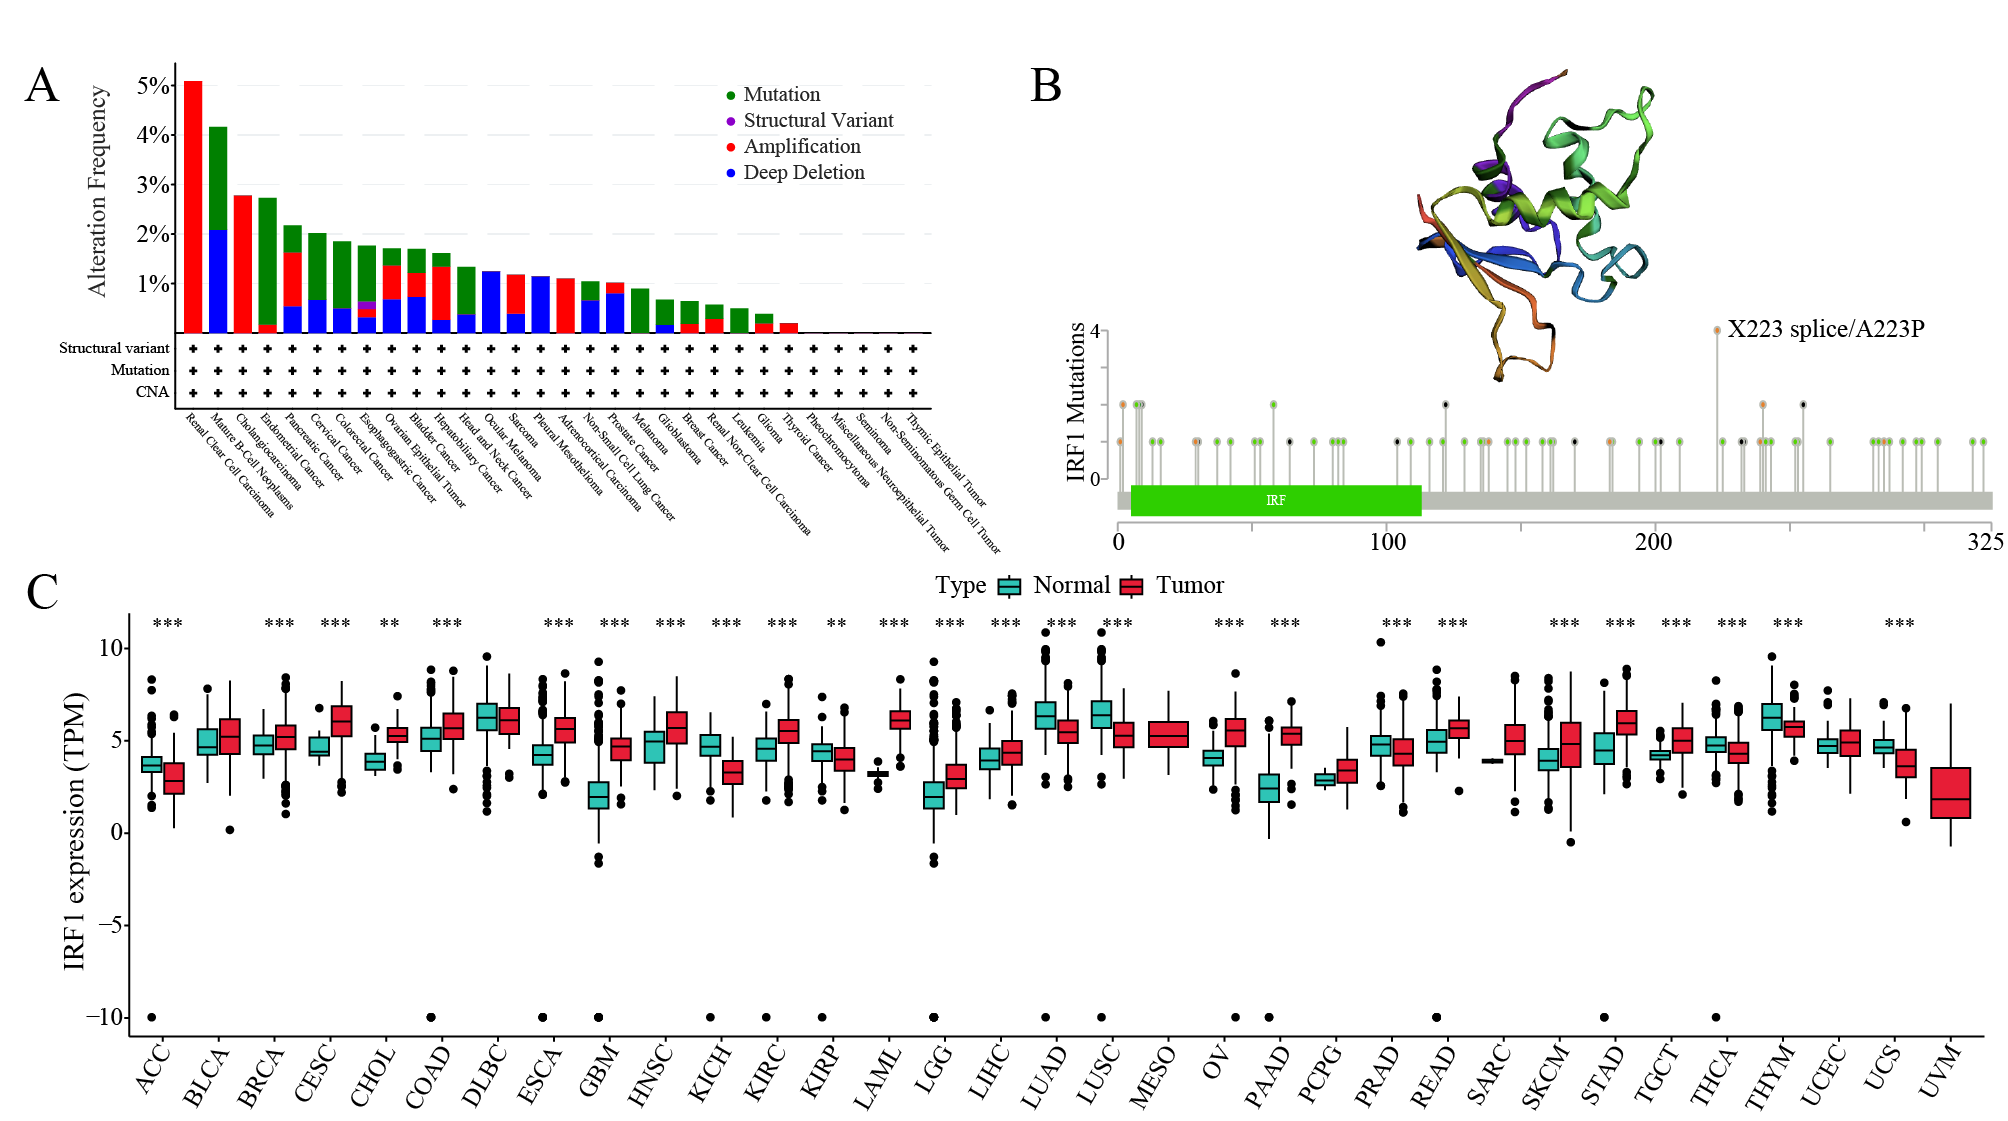


**Figure S1. High expression of IRF1 in gastric cancer tissues based on TCGA and GTEx databases**

**A:** Mutation status of the IRF1 gene in different tissue sources from the cBioPortal database, including gene point mutations (dark green), structural variations (purple), copy number amplifications (red), and deletions (blue).

**B:** Three-dimensional structure of IRF1 and common SNP mutation sites.

**C:** Differential expression of IRF1 across 33 different tumor types and adjacent normal tissues based on TCGA and GTEx databases, where red represents tumor tissues and blue-green represents adjacent normal tissues.


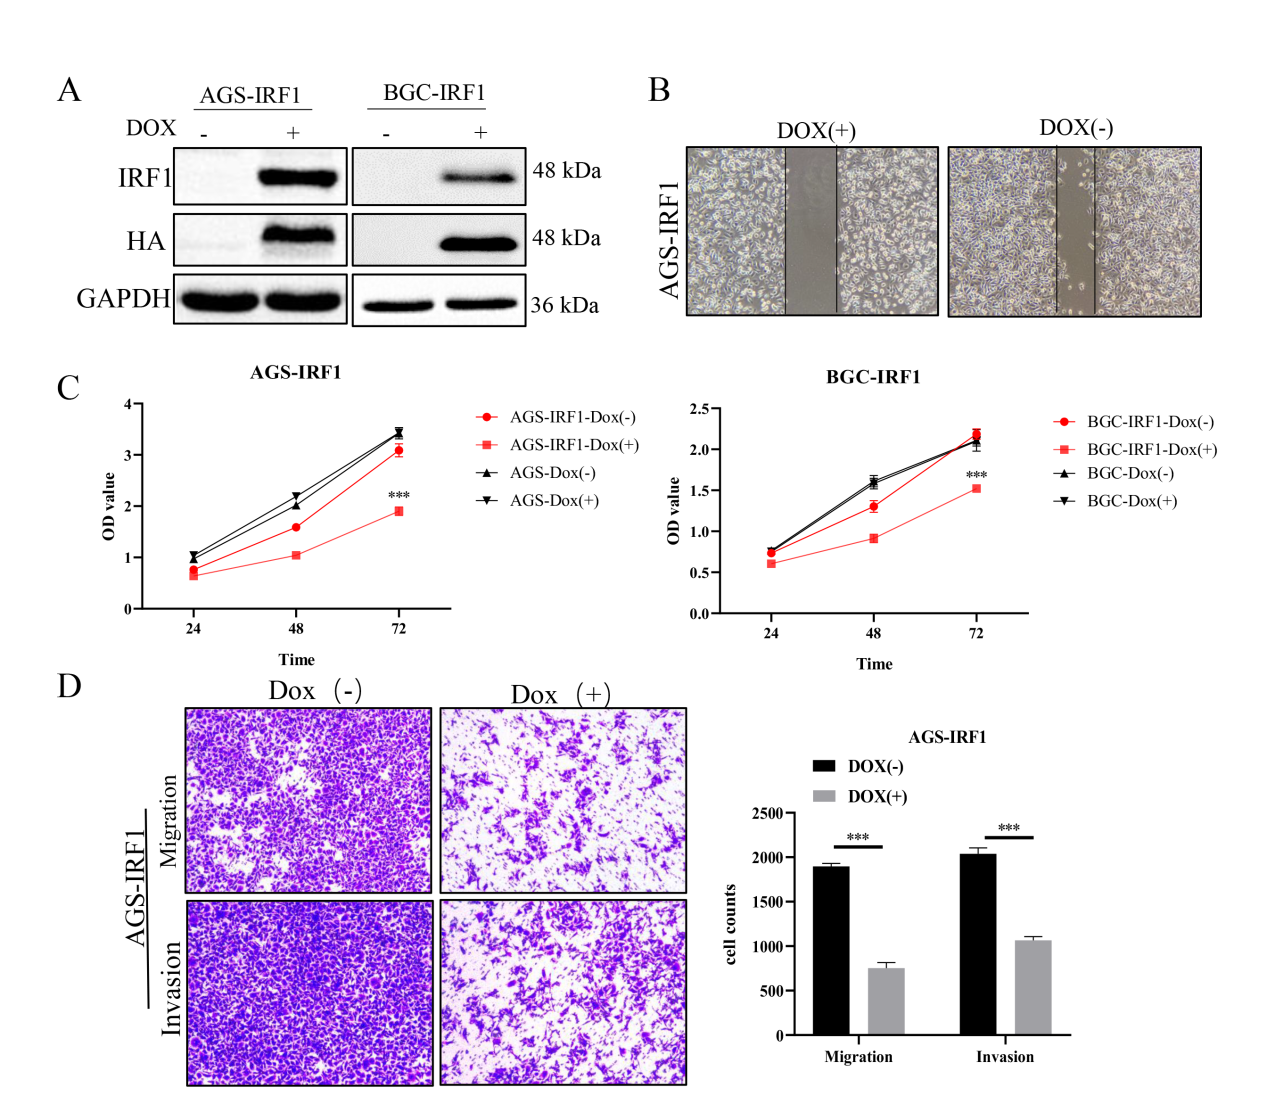


**Figure S2. Effects of stable IRF1 expression on gastric cancer cell function**

**A:** Western blot (WB) validation of IRF1 expression in stable gastric cancer cell lines.

**B:** Wound healing assay of AGS-IRF1 stable cell line after **48 hours of Dox induction**, showing that **IRF1 overexpression inhibits gastric cancer cell migration**.

**C:** CCK-8 cytotoxicity assay demonstrating that **Dox-induced IRF1 overexpression suppresses gastric cancer cell proliferation**.

**D:** Transwell migration and invasion assays showing that **IRF1 overexpression (48 hours after Dox induction) inhibits migration and invasion in AGS-IRF1 stable cell lines**.

**P < 0.05, **P < 0.01, ***P < 0.001.*

*
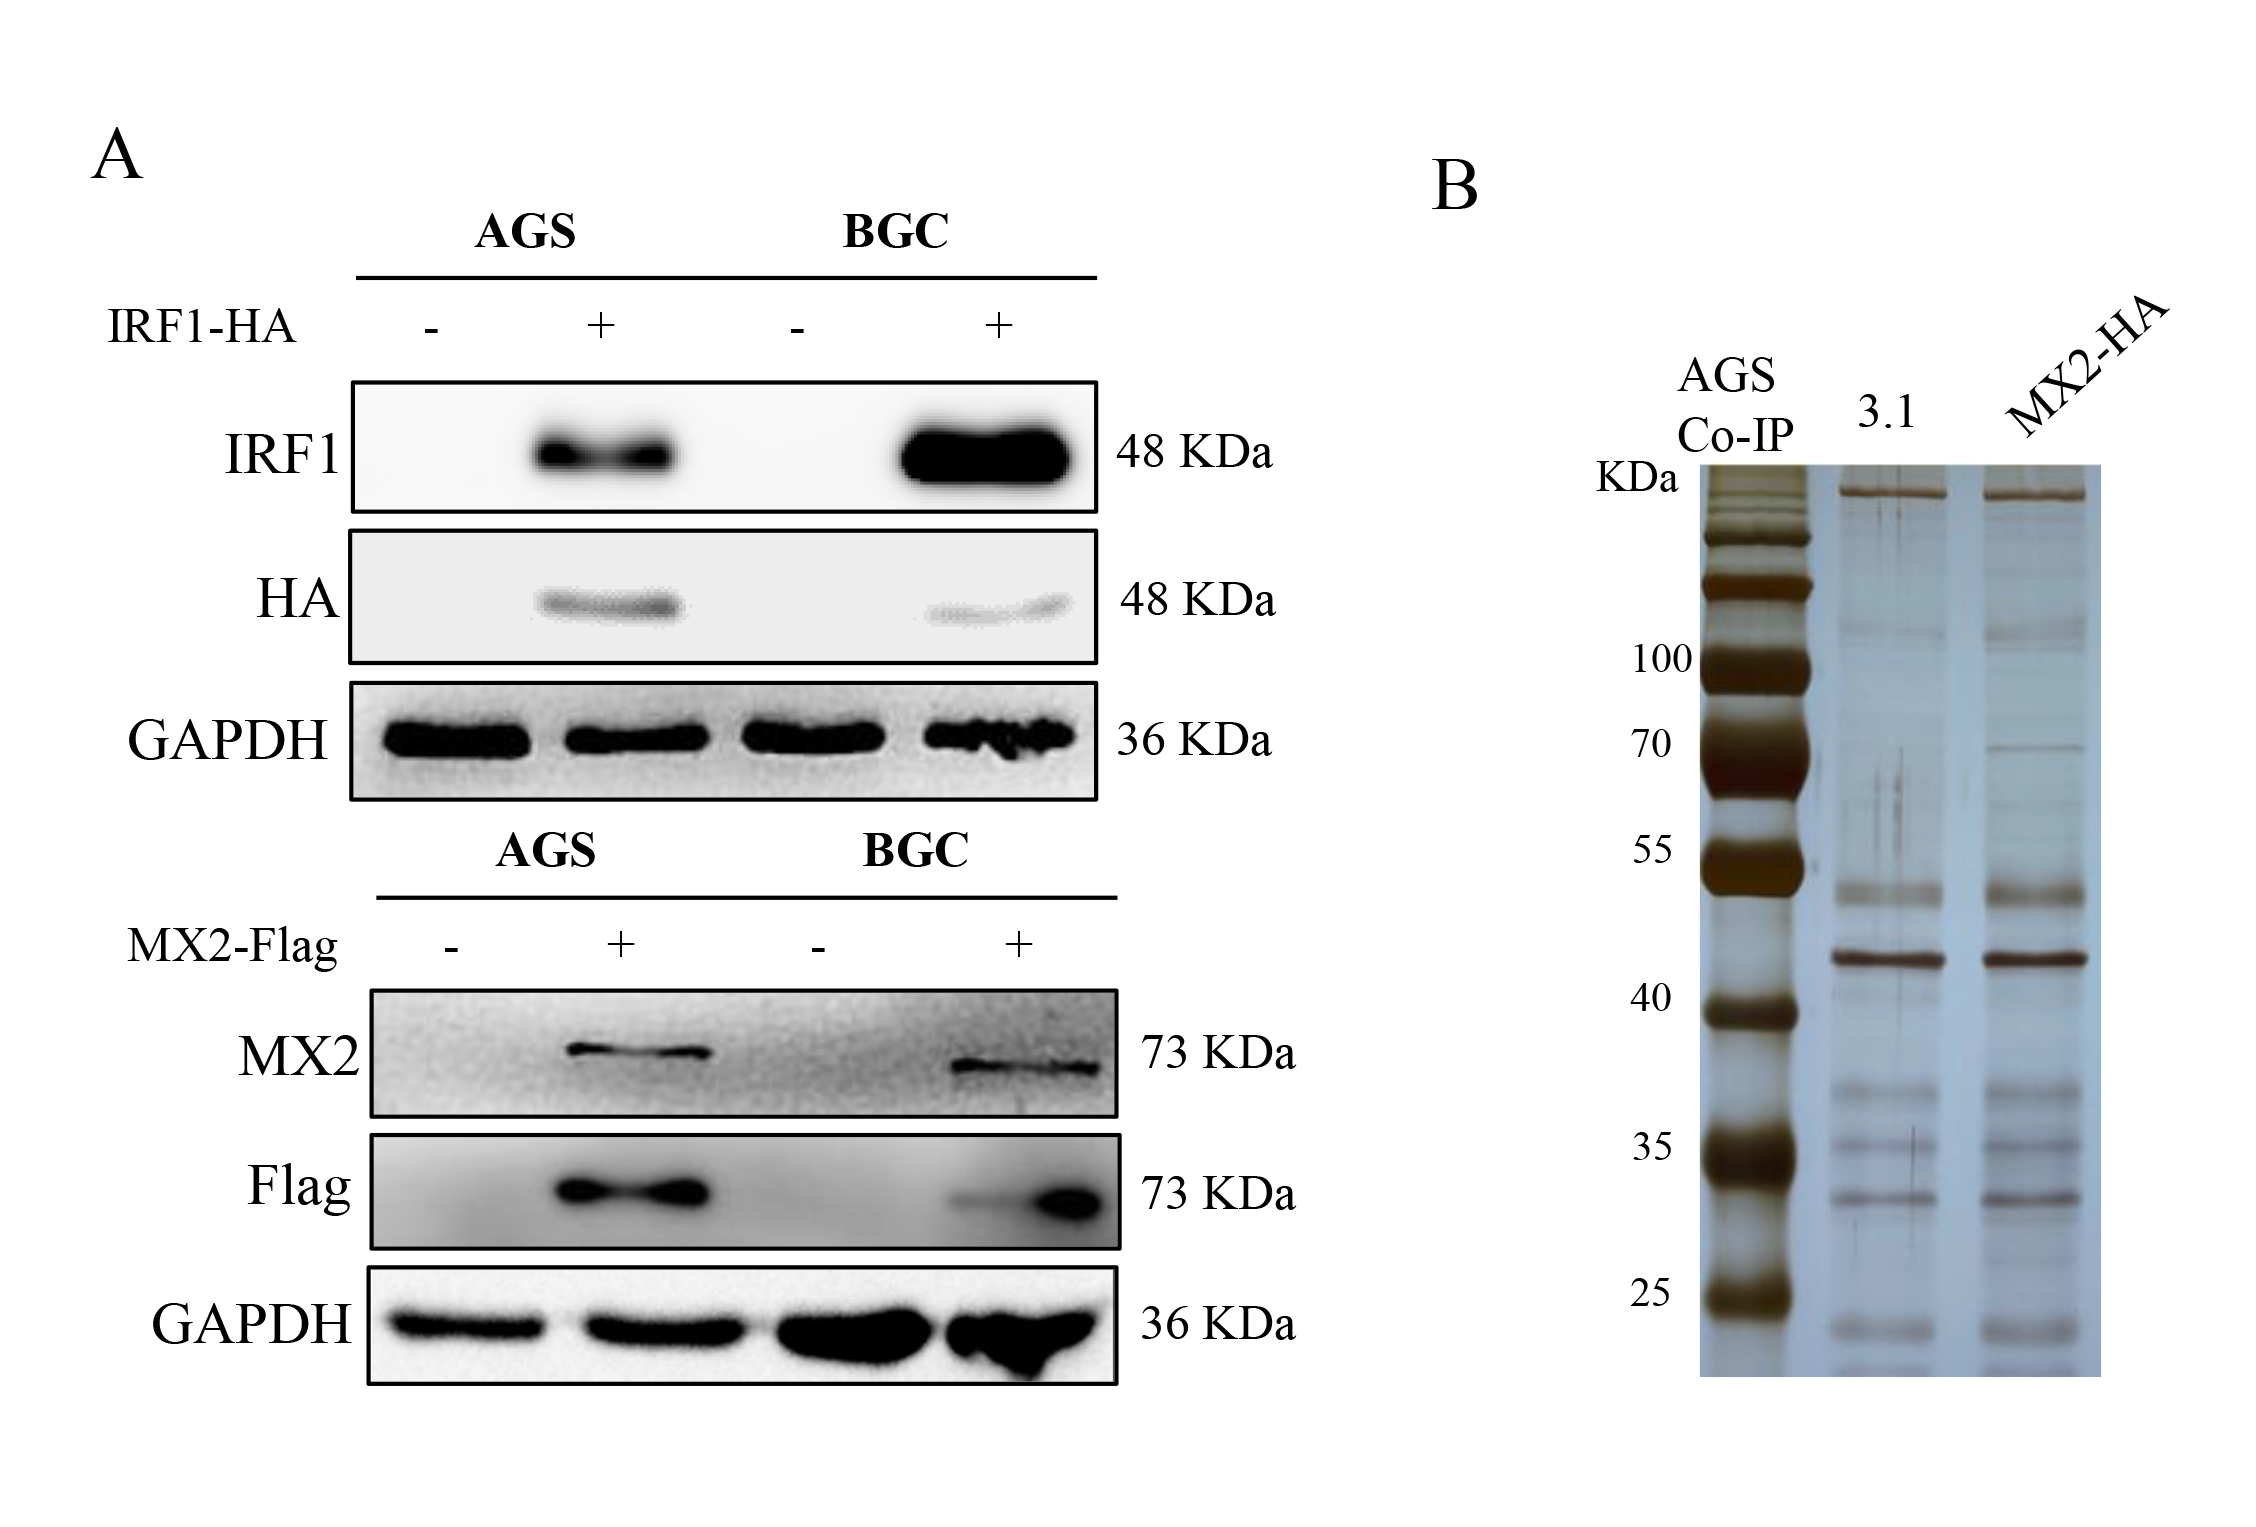
*

**Figure S3. Interaction between IRF1 and MX2 proteins**

**A:** Protein expression levels after co-transfection of IRF1 and MX2 plasmids in gastric cancer cells.

**B:** Silver staining results of immunoprecipitated proteins after IRF1 immunoprecipitation.
